# Supplementary material for: Matching emerging formic acid synthesis processes with application requirements
Source: Royal Society of Chemistry journal article supplement (doi:10.1039/d1gc04791d), 2022-01-01
Supplement: d1gc04791d1.pdf [file d1gc04791d1.pdf]

## Supplementary information

# Matching emerging formic acid synthesis processes with application requirements

Barbara Thijs,<sup>a</sup> Jan Rongé<sup>a</sup> and Johan A. Martens<sup>\*a</sup>

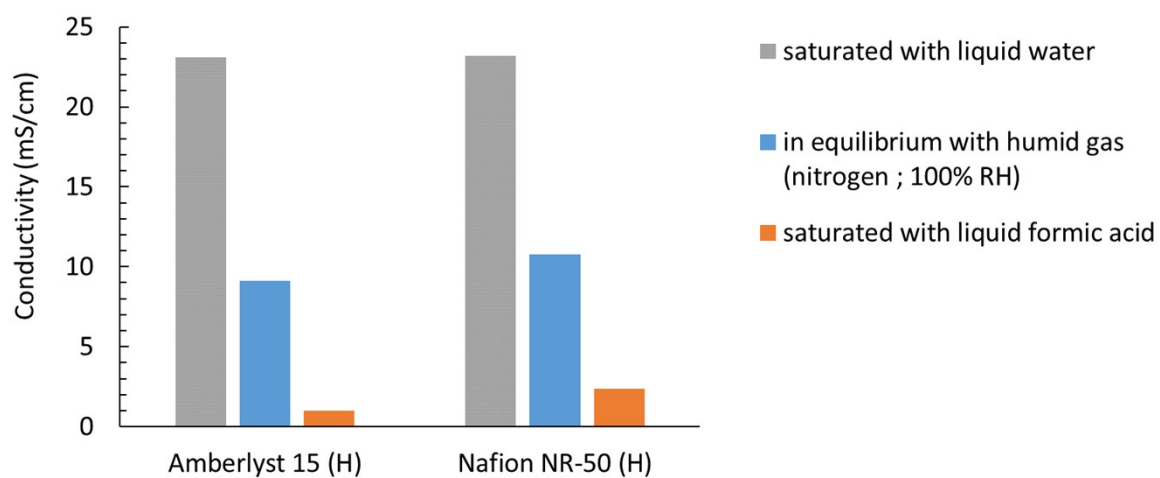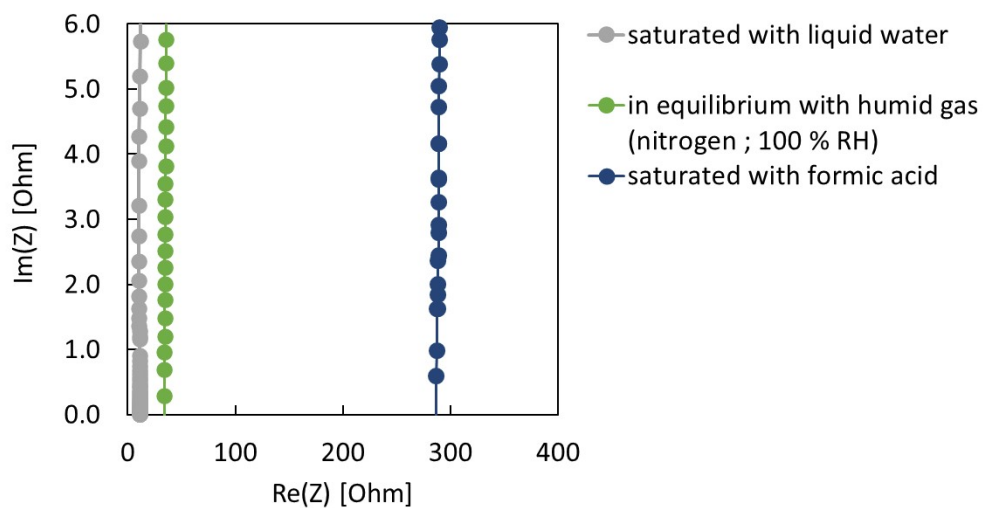

**Fig. S1 : Top** : Conductivity of two types of proton exchange solid state electrolyte ('PE-SSE') resin beads saturated either with liquid water, concentrated formic acid or after equilibration with a humid N<sub>2</sub> gas flow at a relative humidity of 100% at room temperature. A 5 mm thick layer of resin beads was pressed between two stainless steel plates and the resistance was determined from Nyquist plots obtained with potentiostatic electrochemical impedance spectroscopy (pEIS ; 0V). **Bottom** : Nyquist plots for Amberlyst 15 (H) PE-SSE resin beads.

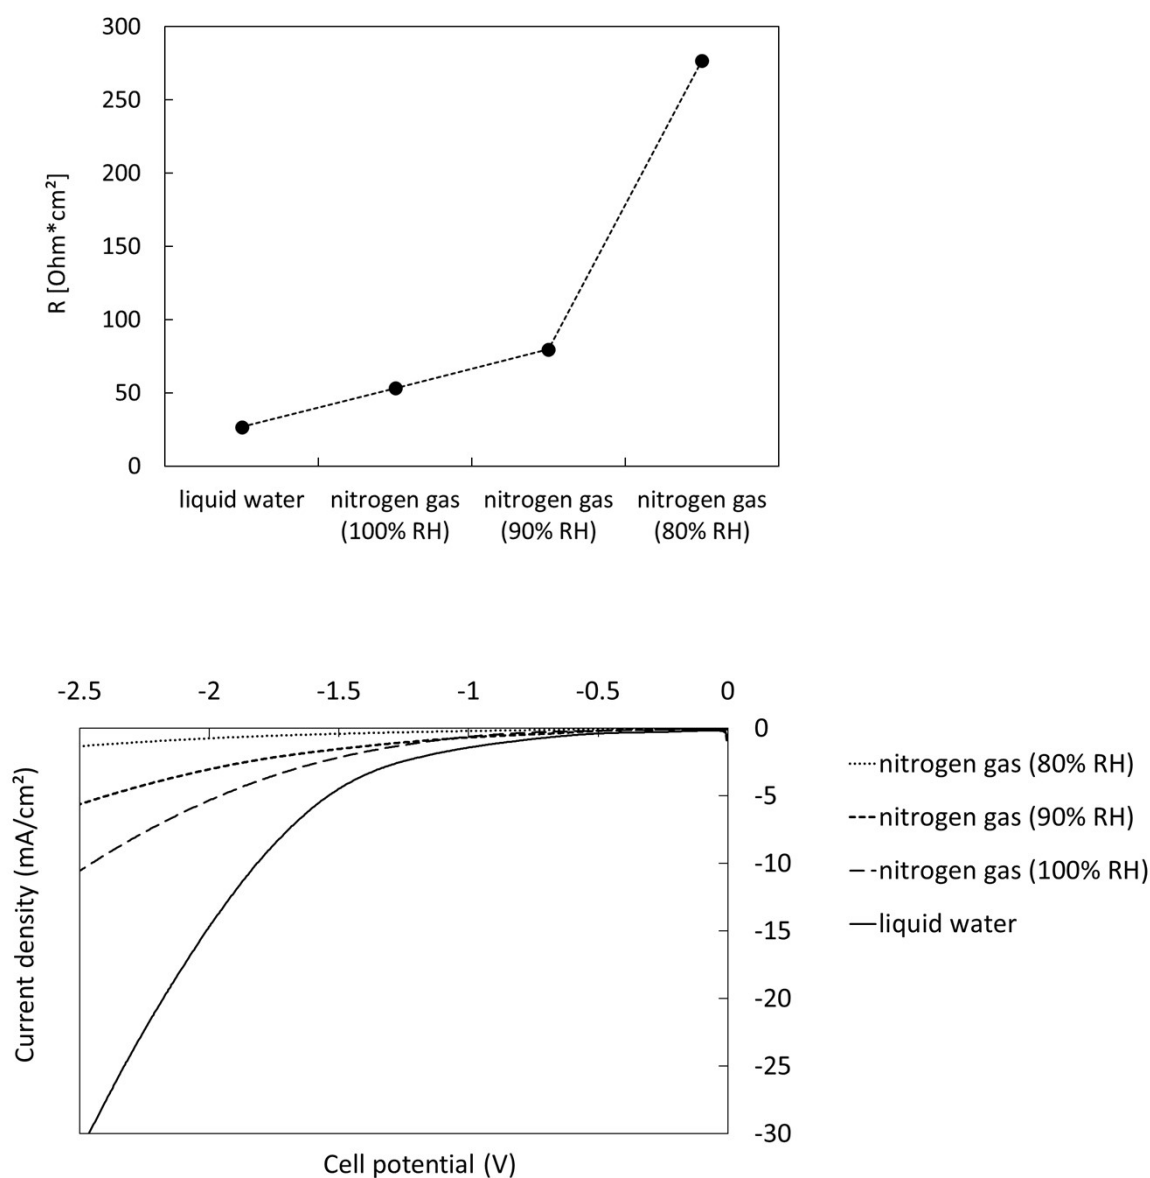

**Fig. S2** : Resistance measurements (**top**) and cyclic voltammetry (CV) measurements (**bottom**) for a three-compartment electrolyser for CO<sub>2</sub> reduction to formic acid at different humidity conditions. The membrane electrode assembly consisted of a Pt on C-cloth anode, a PEM (Nafion 117), SSE resin (Amberlyst-15H ; 3 mm thick layer), AEM (Fumasep FAD-PET-75) and Sn/Cu cathode coated with Pention D35 ionomer. In the middle compartment, either a liquid water flow or a humid gas flow was used. **Top** : The resistance was measured with potentiostatic electrochemical impedance spectroscopy (pEIS ; 0V) after exposing the MEA to the operating conditions until an equilibrium value was reached for the resistance, which is depicted here. **Bottom** : The CV curves were measured at equilibrium at a scan rate of 5 mV/s.

**Table S1** : additional information for the determination of the round-trip efficiencies for various energy storage media. Transport is not taken into account.

|                             | Li-ion battery | Pumped hydro   | Hydrogen *1                |                | Methane *2     | Ammonia *3     | Formic acid *4 |
|-----------------------------|----------------|----------------|----------------------------|----------------|----------------|----------------|----------------|
|                             |                |                | Compressed (350 - 700 bar) | Liquefied      | Compressed     | Liquefied      |                |
| Energy to fuel (kWh/kg)     |                |                | 50 – 55                    |                |                |                | 2.6 - 5.7      |
| Fuel processing (kWh/kg)    |                |                | 2 – 6                      | 7 - 13         |                |                | 2.3 – 9.6      |
| Energy content (LHV)        |                |                | 33.3                       |                |                | 5.2            | 1.72           |
| Conversion efficiency (%)   |                |                | 55 - 64                    | 49 - 58        |                | 43 - 52        | 11 - 35        |
| Reconversion efficiency (%) |                |                | 50 - 70                    |                |                | 45             | 45             |
| Round-trip efficiency (%)   | <b>80 – 95</b> | <b>70 – 80</b> | <b>34 - 45</b>             | <b>25 - 41</b> | <b>30 - 38</b> | <b>19 - 23</b> | <b>5 - 16</b>  |

#### \*1 : Hydrogen

Assuming H<sub>2</sub> formation from renewable energy with a PEM electrolyser with an energy efficiency of ca.70%,<sup>1</sup> followed by compression or liquefaction<sup>2</sup> and reconversion to energy in a hydrogen fuel cell with an energy efficiency of 50-70%.<sup>3</sup>

#### \*2 : Methane

Assuming H<sub>2</sub> formation from renewable energy by an electrolyser, catalytic CO<sub>2</sub> methanation by the Sabatier-Senderens reaction and compression to 80 bar.<sup>4</sup>

#### \*3 : Ammonia

Assuming one kg of ammonia production requires 9–15 kWh of energy.<sup>5</sup> For reconversion, ammonia is cracked into high-purity hydrogen, compressed and used in a PEMFC.<sup>5</sup>

#### \*4 : Formic acid

Assuming electrochemical production of formic acid from CO<sub>2</sub> and H<sub>2</sub>O in a CO<sub>2</sub> electrolyzer. Post-processing is done by distillation and reconversion to energy by reforming of formic acid to H<sub>2</sub> followed by a H<sub>2</sub> fuel cell (“HYFORM-PEMFC”, as described by Ma *et al.*<sup>6</sup>). Fuel processing of formic acid refers to the concentration process. A feed concentration of 10 wt.% is assumed, which requires 2.3-9.6 kWh/kg depending on the concentration method, as derived from Ramdin *et al.* (Fig. S4 from <sup>7</sup>), calculated from given operational cost in \$/kg, assuming energy cost is biggest contributor to the operating costs with an electricity price of 50 \$/MWh.<sup>7</sup>

## References

- 1 W. Colella, B. James, J. Moron, G. Saur and T. Ramsden, *Techno-economic Analysis of PEM Electrolysis for Hydrogen Production*, 2014.
- 2 U.S Department Of Energy, *Hydrogen and Fuel Cells Program: Hydrogen Storage*, 2009, vol. 25.
- 3 M. Handwerker, J. Wellnitz and H. Marzbani, *Hydrogen*, 2021, **2**, 76–100.
- 4 M. Sterner, M. Jentsch and U. Holzhammer, *Fraunhofer Inst. für Wind. und Energiesystemtechnik*, 2011, 18.
- 5 S. Giddey, S. P. S. Badwal, C. Munnings and M. Dolan, *ACS Sustain. Chem. Eng.*, 2017, **5**, 10231–10239.
- 6 Z. Ma, U. Legrand, E. Pahija, J. R. Tavares and D. C. Boffito, *Ind. Eng. Chem. Res.*, 2021, **60**, 803–815.
- 7 M. Ramdin, A. R. T. Morrison, M. De Groen, R. Van Haperen, R. De Kler, L. J. P. Van Den Broeke, J. P. Martin Trusler, W. De Jong and T. J. H. Vlugt, *Ind. Eng. Chem. Res.*, 2019, **58**, 1834–1847.
